# Supplementary material for: Selective conversion of hydroxymethylfurfural to diformylfuran using copper hydroxide nitrate with various nano-structures: a comparative study
Source: Royal Society of Chemistry journal article supplement (doi:10.1039/d1se01443a), 2021-11-22
Supplement: d1se01443a1.pdf [file d1se01443a1.pdf]

## **The Supporting Information**

*for*

Selective Conversion of Hydroxymethylfurfural to  
Diformylfuran using Copper Hydroxide Nitrate  
with Various Nano-Structures: A Comparative  
Study

Table S1. Concentrations of Cu and nitrate ( $\text{NO}_3^-$ ) in the solvent after HMF oxidation (catalyst = TEMPO = 0.5 g/L, solvent = DMSO, T = 100 °C,  $t$  = 60 min)

| Catalysts  | Cu (mg/L) | nitrate ( $\text{NO}_3^-$ ) (mg/L) |
|------------|-----------|------------------------------------|
| CHN-bar    | 0.23      | 0.2                                |
| CHN-strip  | 0.31      | 0.5                                |
| CHN-flower | 0.26      | 0.3                                |

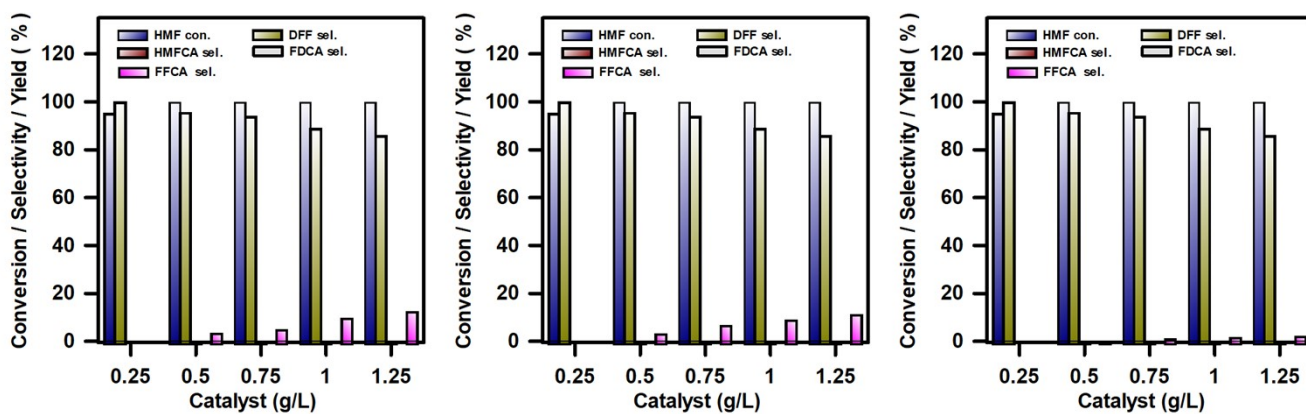

Fig. S1. Effect of catalyst dosage on selectivity of HMF oxidative: (a) CHN-bar, (b) CHN-strip, and (c) CHN-flower ( $T = 100\text{ }^{\circ}\text{C}$ ,  $t = 60\text{ min}$ )

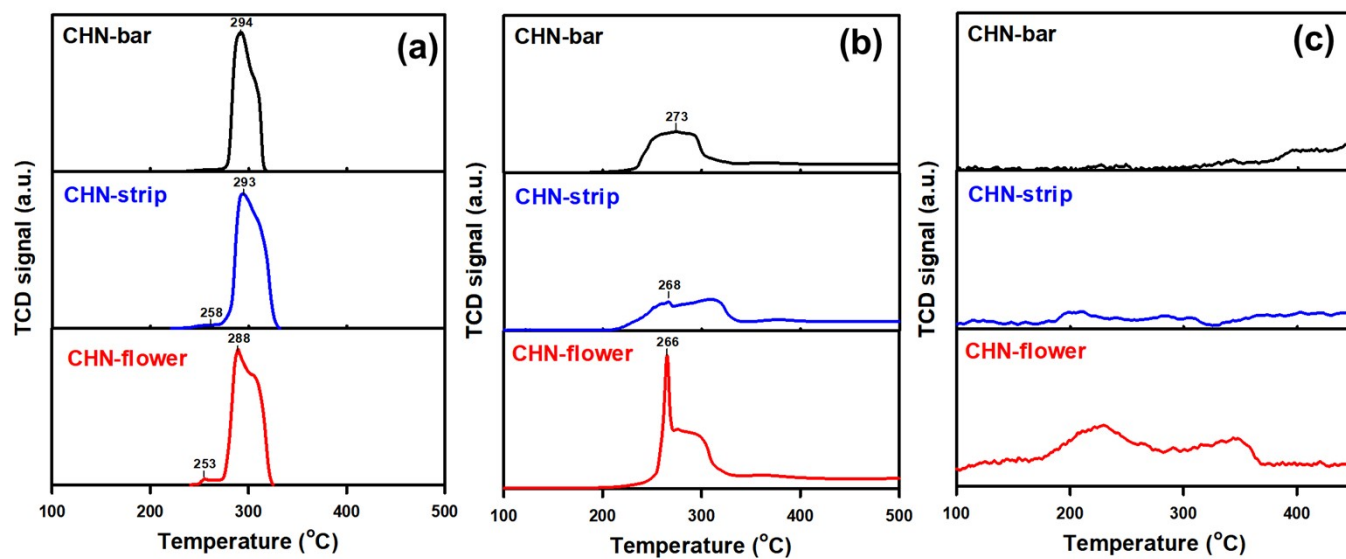

Fig. S2. (a) TPR profiles, (b) NH<sub>3</sub>-TPD, and (c) O<sub>2</sub>-TPD profiles of CHNs.
